# Supplementary material for: Anti-inflammatory, analgesic, antipyretic and antidiabetic activities of Abutilon hirtum (Lam.) Sweet
Source: Springer Nature journal article supplement (doi:10.1186/s40816-018-0069-8), 2018-04-04
Supplement: MOESM2 [file 15703684]

Diagram representing the analgesic activity of the total ethanolic extract and different fractions of *A. hirtum* leaves.

|  |  |
| --- | --- |
|  |  |
|  |  |
|  | |
